# Supplementary material
Source: publisher site journal article supplement (https://www.degruyter.com/publication/isbn/9783110376142/downloadAsset/9783110376142_Contents.pdf)
Supplement: Supplementary file 1 [file 9783110376142_Contents.pdf]

# Table of Contents

**Acknowledgements — vii**

Stefan Schneider, Julie Glikman and Mathieu Avanzi

**Introduction — 1**

## Section I: Theoretical Issues

Frederick J. Newmeyer

**Parentheticals and the grammar of complementation — 13**

Gunther Kaltenböck, Bernd Heine and Tania Kuteva

**On theticals: A “rootless” analysis of *I think* — 39**

James Griffiths

**Speaker and quote reduced parenthetical clauses — 71**

Marlies Kluck and Mark de Vries

**On V2, gaps, and operators in comment and reporting parentheticals — 103**

## Section II: Diachronic and ontogenetic development

Fátima Faya Cerqueiro

**An approach to parenthetical courtesy markers in requests in Late Modern English — 135**

Stefan Schneider and Julie Glikman

**Origin and development of French parenthetical verbs — 163**

Ditte Boeg Thomsen

**Ontogenetic paths to the parenthetical construction — 189**

## Section III: Prosody and its interfaces

Nancy Hedberg and Noureddine Elouazizi

**Epistemic Parenthetical Verb Phrases: C-Command, Semantic Scope and Prosodic Phrasing — 225**

Sylvie Hanote

**Are reporting clauses special cases of parentheticals? — 257**

Güliz Güneş and Çağrı Çöltekin

**Mapping to prosody: Not all parentheticals are alike — 287**

Silvana Abalada and Aida Cardoso

**The Vocative in European Portuguese: Prosodic Effects of its position in the sentence — 333**

**Index — 355**
